# Supplementary material for: Examining the Trajectory of Ground Glass Nodule Patients in China: A Real-World Perspective
Source: Research Square preprint supplement (doi:10.21203/rs.3.rs-8344228/v1), 2026-01-16
Supplement: Supplementary file 1 [file 3b56ede57fb007daf373d31a.docx]

| **Appendix Table 1**. Definitions and search terms for identifying the study population | | | |
| --- | --- | --- | --- |
|  | **Definition** | **Search Terms and Strategy** | **EMR resource** |
| Biopsy | Percutaneous or bronchoscopy lung biopsy (not involving any lung surgery), with/without imaging | Using the following terms to search from surgery records and/or medical orders:  *‘经支气管镜’ OR ‘EBUS’ OR ‘超声支气管镜下’ OR ‘经胸廓穿刺’ OR ‘经胸壁穿刺’ OR ‘超声引导下细针穿刺’ OR ‘EBUS-TBNA’ OR ‘TTNA’ OR ‘TBLB’ AND ‘肺活检(术)’* | 1. Surgery record 2. Non-drug order record |
| Surgery | Lung surgery (not involving any lung biopsy), including open, VATS, and RAS, with/without imaging. | Using the following terms to search from surgery records:  *‘VATS’ OR ‘RATS’ OR ‘开胸手术’ OR ‘胸腔镜下’ OR ‘纵隔镜下’* | 1. Surgery record 2. Non-drug order record |
| Surgery + Biopsy | Performed both lung biopsy and surgery at the same visit, with/without imaging. | Same as above | 1. Surgery record 2. Non-drug order record |
| Imaging | Imaging services include X-ray, ultrasound, CT, HRCT, LDCT, and MRI. | Using the following terms to search from medical orders:  *‘X线’ OR ‘超声’ OR ‘CT’ OR ‘HRCT’ OR ‘LDCT’ OR ‘MRI’* | 1. Examination record 2. Medical order record 3. Medication dispense record 4. Non-drug order record 5. EMR text record |
| Treatment | Treatments include chemotherapy, radiation therapy, immunotherapy, targeted therapy | Using the following terms to search from medical orders: *‘化疗’ OR ‘放疗’ OR ‘免疫治疗’ OR ‘靶向治疗’* | 1. Examination record 2. Medical order record 3. Medication dispense record 4. Non-drug order record 5. EMR text record |
| None  (i.e. other services) | Patients received services or procedures during the index visit that do not include any biopsy, surgery, imaging, or treatment, as defined above. | | Medical order record |
